# Supplementary material for: Serum cholesterol-riched apolipoprotein-B (apoB) containing lipoproteins predict the response to immune checkpoints inhibitors (ICIs) in non-small cell lung cancer (NSCLC) : A retrospective analysis
Source: Research Square preprint supplement (doi:10.21203/rs.3.rs-1749981/v1), 2022-06-21

| Subgroup               | HR (95%CI)            | P.val |
|------------------------|-----------------------|-------|
| <b>Gender</b>          |                       |       |
| Male (68)              | 2.09<br>1.11 – 3.94   | 0.022 |
| <b>Age</b>             |                       |       |
| Young (43)             | 1.92<br>0.93 – 3.95   | 0.078 |
| old (36)               | 3.42<br>1.21 – 9.66   | 0.002 |
| <b>Histology</b>       |                       |       |
| LUAD (44)              | 1.98<br>0.90 – 4.36   | 0.088 |
| LUSC (29)              | 4.35<br>1.49 – 12.68  | 0.007 |
| <b>Diabets</b>         |                       |       |
| N (65)                 | 3.03<br>1.60 – 5.76   | 0.001 |
| Y (12)                 | 0.59<br>0.11 – 3.26   | 0.546 |
| <b>Smoking History</b> |                       |       |
| N (18)                 | 11.38<br>2.28 – 56.86 | 0.003 |
| Y (59)                 | 2.07<br>1.03 – 4.17   | 0.041 |
| <b>Total (79)</b>      | 2.54<br>1.41 – 4.60   | 0.002 |

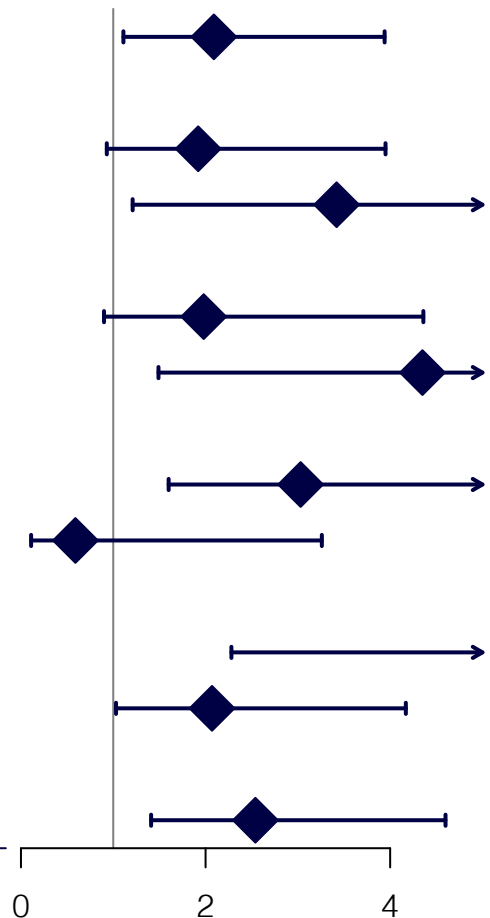

Supplement: Supplementary file 1 [file 264cb28986d6f53e62020a5d.zip]
