# Supplementary material for: Serum cholesterol-riched apolipoprotein-B (apoB) containing lipoproteins predict the response to immune checkpoints inhibitors (ICIs) in non-small cell lung cancer (NSCLC) : A retrospective analysis
Source: Research Square preprint supplement (doi:10.21203/rs.3.rs-1749981/v1), 2022-06-21

| Subgroup               | OR (95%CI)           | P.val |
|------------------------|----------------------|-------|
| <b>Gender</b>          |                      |       |
| Male (76)              | 3.5<br>1.27 – 10.26  | 0.018 |
| <b>Age</b>             |                      |       |
| Young (49)             | 4.4<br>1.27 – 17.08  | 0.023 |
| old (40)               | 4.59<br>1.09 – 21.95 | 0.043 |
| <b>Histology</b>       |                      |       |
| LUAD (50)              | 6.11<br>1.74 – 24.35 | 0.006 |
| LUSC (33)              | 3.06<br>0.70 – 15.00 | 0.145 |
| <b>Diabets</b>         |                      |       |
| N (75)                 | 4.87<br>1.73 – 14.7  | 0.003 |
| <b>Smoking History</b> |                      |       |
| Y (67)                 | 2.35<br>0.79 – 7.27  | 0.127 |
| <b>Total (89)</b>      | 4.53<br>1.77 – 12.34 | 0.002 |

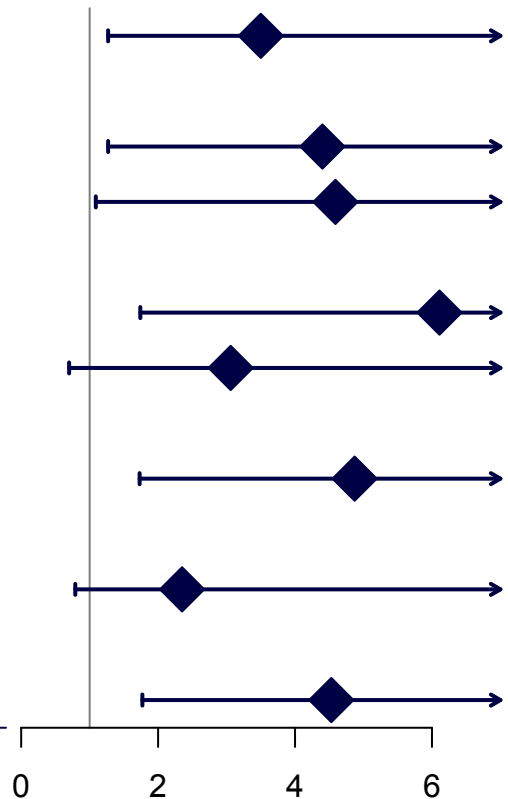

Supplement: Supplementary file 2 [file 264cb28986d6f53e62020a5d.zip]
