# Supplementary material for: Serum cholesterol-riched apolipoprotein-B (apoB) containing lipoproteins predict the response to immune checkpoints inhibitors (ICIs) in non-small cell lung cancer (NSCLC) : A retrospective analysis
Source: Research Square preprint supplement (doi:10.21203/rs.3.rs-1749981/v1), 2022-06-21

| Subgroup               | OR (95%CI)           | P.val |
|------------------------|----------------------|-------|
| <b>Gender</b>          |                      |       |
| Male (66)              | 3.32<br>1.21 – 9.61  | 0.022 |
| <b>Age</b>             |                      |       |
| < 65 (44)              | 3.71<br>1.10 – 13.67 | 0.040 |
| ≥ 65 (31)              | 5.25<br>1.13 – 28.53 | 0.041 |
| <b>Histology</b>       |                      |       |
| LUAD (42)              | 3.82<br>1.08 – 14.70 | 0.042 |
| LUSC (27)              | 5.62<br>1.15 – 33.09 | 0.041 |
| <b>Diabets</b>         |                      |       |
| N (62)                 | 5.82<br>1.95 – 19.02 | 0.002 |
| <b>Smoking History</b> |                      |       |
| Y (55)                 | 2.34<br>0.77 – 7.40  | 0.138 |
| Total (75)             | 4.34<br>1.66 – 11.94 | 0.003 |

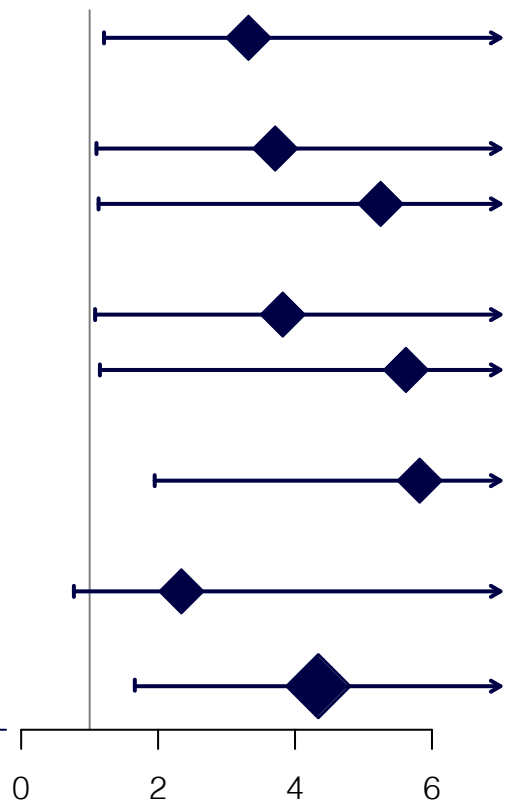

Supplement: Supplementary file 9 [file 264cb28986d6f53e62020a5d.zip]
