# Supplementary figures and images for: Serum cholesterol-riched apolipoprotein-B (apoB) containing lipoproteins predict the response to immune checkpoints inhibitors (ICIs) in non-small cell lung cancer (NSCLC) : A retrospective analysis
Source: Research Square preprint supplement (doi:10.21203/rs.3.rs-1749981/v1), 2022-06-21

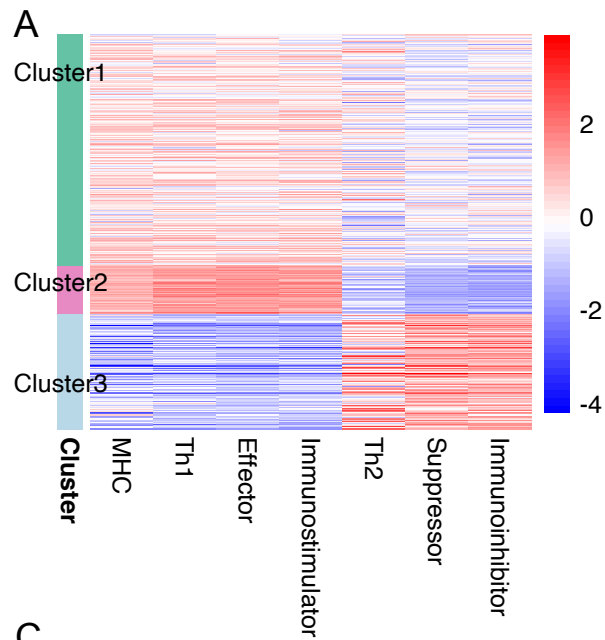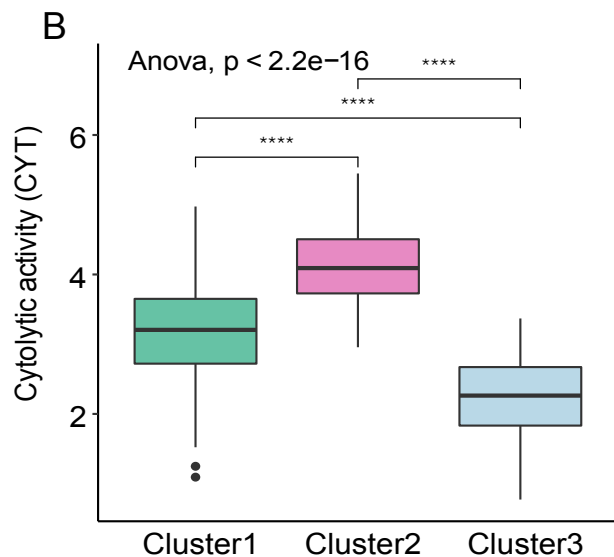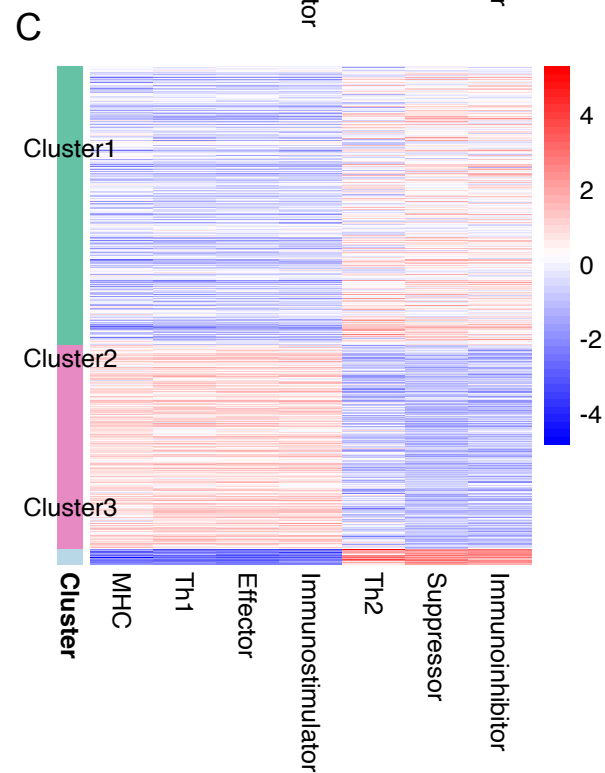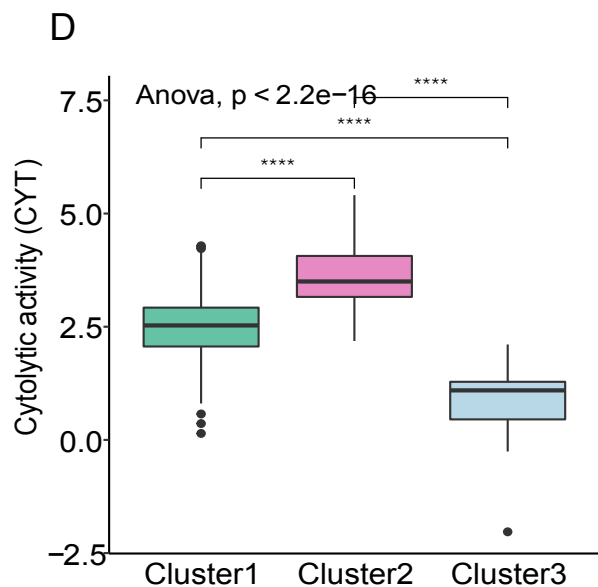

Supplement: Supplementary file 4 [file 264cb28986d6f53e62020a5d.zip]

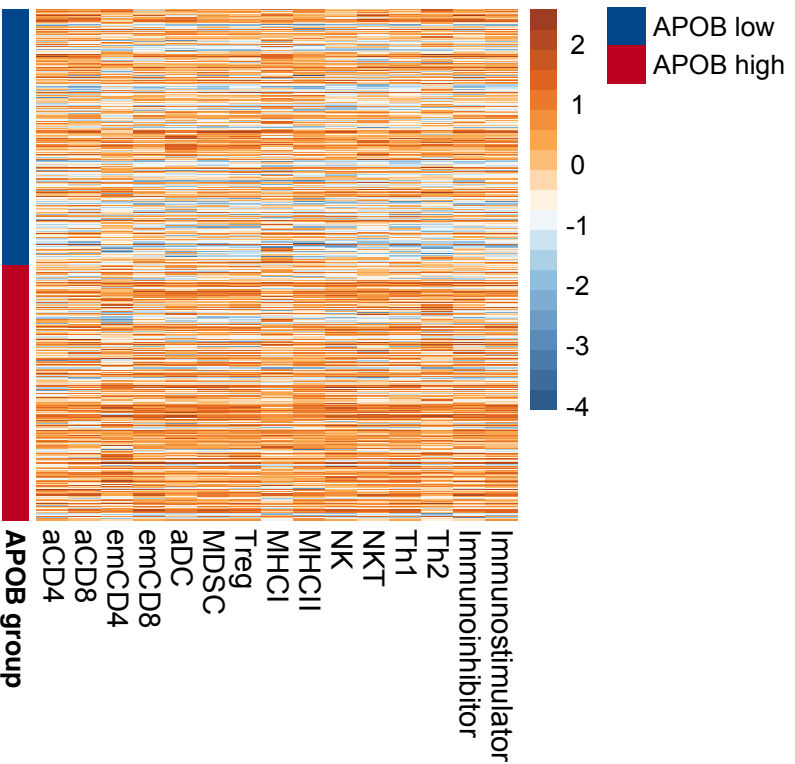

Supplement: Supplementary file 12 [file 264cb28986d6f53e62020a5d.zip]

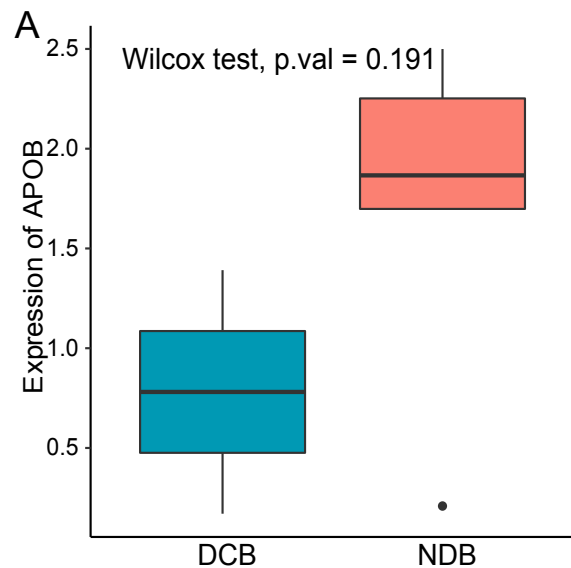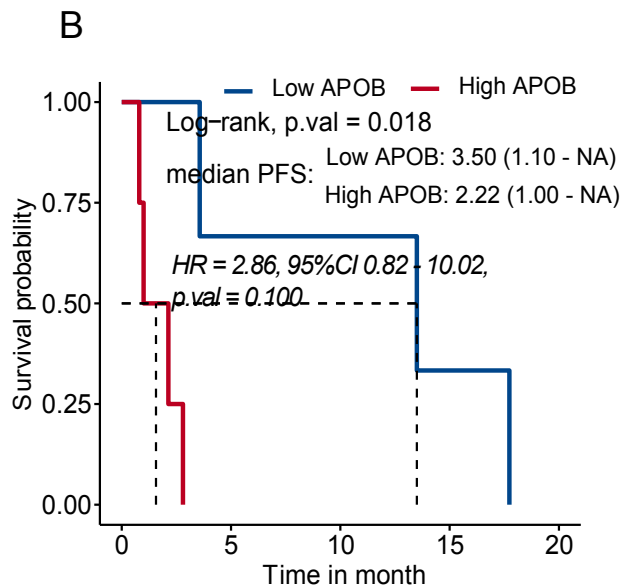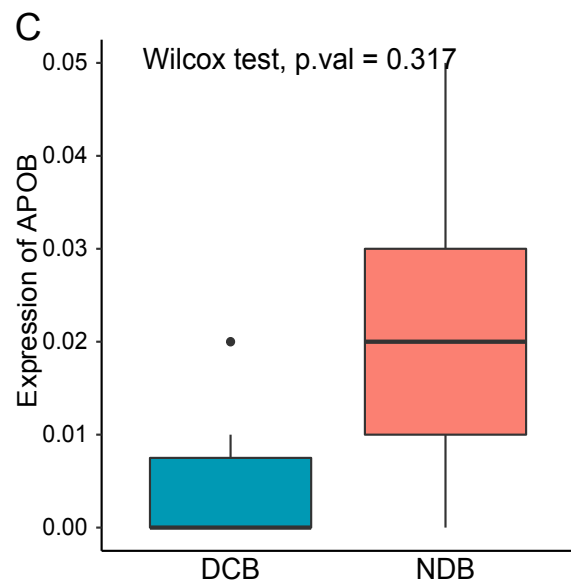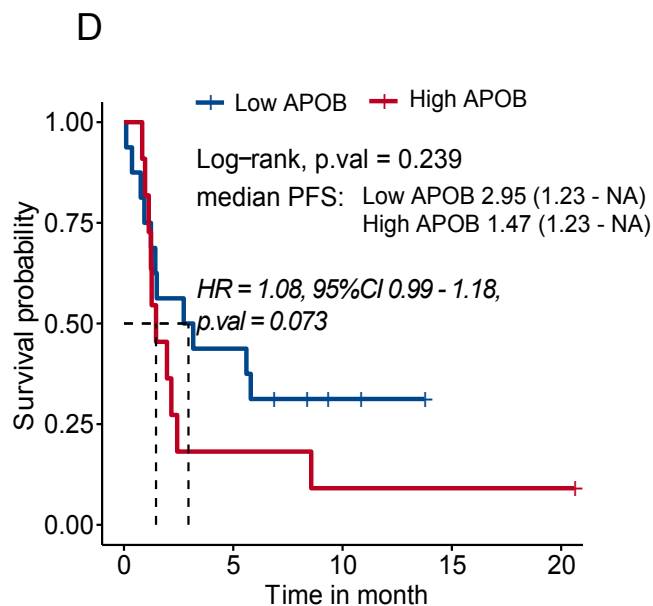

Supplement: Supplementary file 13 [file 264cb28986d6f53e62020a5d.zip]

**A**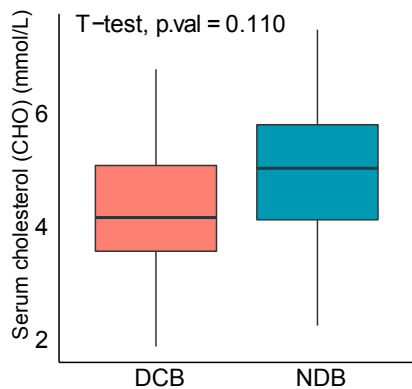**B**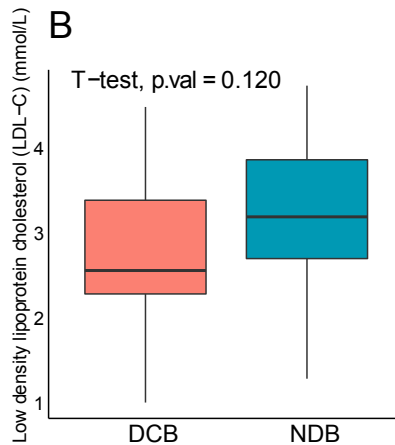**C**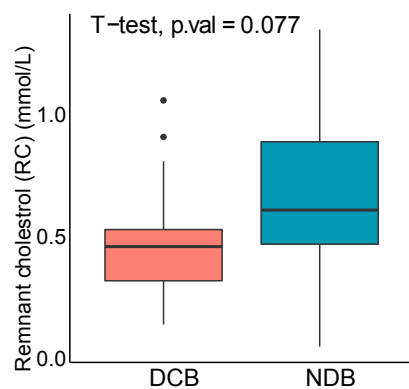**D**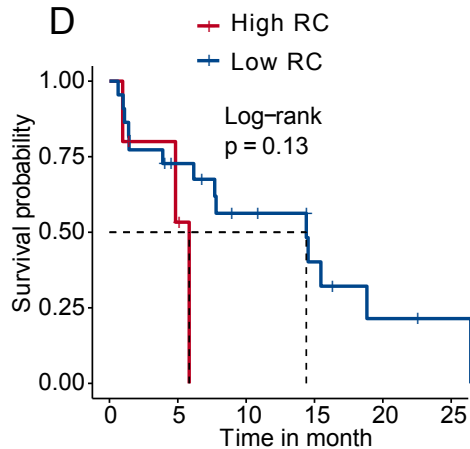**E**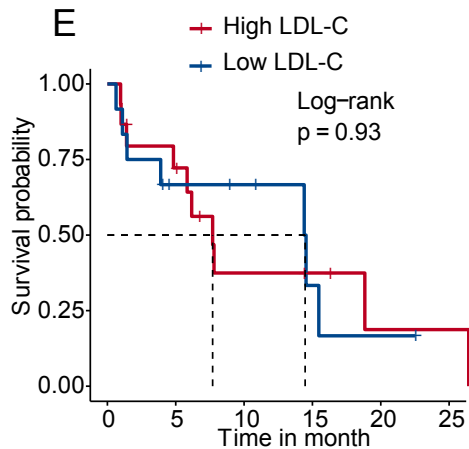

Supplement: Supplementary file 14 [file 264cb28986d6f53e62020a5d.zip]

**A**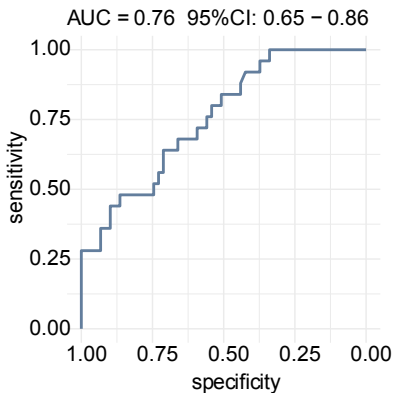**B**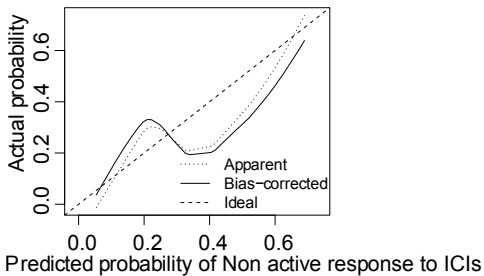

Supplement: Supplementary file 15 [file 264cb28986d6f53e62020a5d.zip]
